Title: Epigenetic clocks and risk assessment in adult spinal deformity: A novel association between pace of aging with frailty, disability, and postoperative complications

Author names and Affiliations:

#### AUTHOR INFORMATION

Michael M. Safaee, MD\*<sup>1</sup>, Varun B. Dwaraka, PhD\*<sup>2</sup>, Justin M. Lee, BA<sup>3</sup>, Marissa Fury, BS<sup>3</sup>, Tavis L Mendez, PhD<sup>2</sup>, Ryan Smith, BS<sup>2</sup>, Jue Lin, PhD<sup>4</sup>, Dana L. Smith, MS<sup>4</sup>, John F. Burke, MD<sup>3</sup>, Justin K. Scheer, MD<sup>3</sup>, Hannah Went, BS<sup>2</sup> and Christopher P. Ames, MD<sup>3,5</sup>  
*<sup>1</sup>Department of Neurological Surgery, University of Southern California, Los Angeles, CA, USA*

*<sup>2</sup>TruDiagnostic, Lexington, KY, USA*

*<sup>3</sup>Department of Neurological Surgery, University of California, San Francisco, San Francisco, CA, USA*

*<sup>4</sup>Department of Biochemistry and Biophysics, University of California, San Francisco, San Francisco, CA, USA*

*<sup>5</sup>Department of Orthopedic Surgery, University of California, San Francisco, San Francisco, CA, USA*

↵\*Corresponding author Michael Safaee, MD, Assistant Professor of Neurological Surgery University of Southern California, Phone: 818-693-4242, Fax: 323-442-5301, Email: michael.safaee@med.usc.edu

↵\* Both authors contributed equally

Withdrawal statement: The authors have withdrawn their manuscript owing to altered the findings and conclusions related to complication data. The changes in results were due to further scrutiny of the datasets, and led to the removal of 3 patients due to incomplete data. This refinement led to updated results which changed the conclusion of the complication data.

Therefore, the authors do not wish this work to be cited as reference for the project. If you have any questions, please contact the corresponding author.
